# Supplementary material for: One dimensional assembly of Mn6 single molecule magnets linked by oligothiophene bridges
Source: Royal Society of Chemistry journal article supplement (doi:10.1039/c0dt00043d), 2010-01-01
Supplement: c0dt00043d.pdf [file c0dt00043d.pdf]

## One dimensional assembly of Mn<sub>6</sub> Single Molecule Magnets linked by oligothiophene bridges

Marco Haryono,<sup>a</sup> Marguerite Kalisz,<sup>a</sup> Rodrigue Lescouëzec,<sup>a</sup> Claire Fave,<sup>b,c</sup> Gaëlle Trippe<sup>b,c</sup> Jean-Christophe Lacroix,<sup>b</sup> Yanling Li,<sup>a,d</sup> Mannan Seuleiman,<sup>a</sup> Hélène Rousselière,<sup>a</sup> Abdel Majid Balkhy,<sup>a,e</sup> and Yves Journaux<sup>\*a,d</sup>

<sup>a</sup> Institut Parisien de Chimie Moléculaire, UPMC Univ Paris 06, F-75252 Paris, France.

Fax: 33144273841; Tel: 33144275562; E-mail: [Yves.Journaux@upmc.fr](mailto:Yves.Journaux@upmc.fr)

<sup>b</sup> ITODYS, Université Paris Diderot (Paris 7), Batiment Lavoisier, 15 rue Jean de Baïf, 75205 Paris Cedex 13, France

<sup>c</sup> CNRS, UMR 7086, ITODYS, F-75205 Paris, France

<sup>d</sup> CNRS, UMR7071, Institut Parisien de Chimie Moléculaire, F-75005 Paris, France

<sup>e</sup> Department of Chemistry, University of Damascus, Syria

Table S1. Crystal data and structure refinement for  $[\text{Mn}_6(\text{Et-Sao})_6(\text{EtOH})_4(\text{H}_2\text{O})_2(\text{C}_{10}\text{H}_4\text{O}_4\text{S}_2) \cdot \text{EtOH}]_n$ .

|                                   |                                             |                                |
|-----------------------------------|---------------------------------------------|--------------------------------|
| Identification code               | mhp042                                      |                                |
| Empirical formula                 | C38 H49 Mn3 N3 O13 S                        |                                |
| Formula weight                    | 952.68                                      |                                |
| Temperature                       | 200(2) K                                    |                                |
| Wavelength                        | 0.71073 Å                                   |                                |
| Crystal system                    | Triclinic                                   |                                |
| Space group                       | P -1                                        |                                |
| Unit cell dimensions              | a = 12.5136(13) Å                           | $\alpha = 100.797(13)^\circ$ . |
|                                   | b = 13.188(2) Å                             | $\beta = 93.295(11)^\circ$ .   |
|                                   | c = 14.988(2) Å                             | $\gamma = 110.925(11)^\circ$ . |
| Volume                            | 2248.5(6) Å <sup>3</sup>                    |                                |
| Z                                 | 2                                           |                                |
| Density (calculated)              | 1.407 Mg/m <sup>3</sup>                     |                                |
| Absorption coefficient            | 0.938 mm <sup>-1</sup>                      |                                |
| F(000)                            | 986                                         |                                |
| Crystal size                      | 0.4 x 0.25 x 0.2 mm <sup>3</sup>            |                                |
| Theta range for data collection   | 3.18 to 30.00° .                            |                                |
| Index ranges                      | -17<=h<=17, -18<=k<=18, -20<=l<=21          |                                |
| Reflections collected             | 40264                                       |                                |
| Independent reflections           | 12652 [R(int) = 0.0366]                     |                                |
| Completeness to theta = 30.00°    | 96.3 %                                      |                                |
| Absorption correction             | None                                        |                                |
| Refinement method                 | Full-matrix least-squares on F <sup>2</sup> |                                |
| Data / restraints / parameters    | 12652 / 0 / 536                             |                                |
| Goodness-of-fit on F <sup>2</sup> | 1.074                                       |                                |
| Final R indices [I>2sigma(I)]     | R1 = 0.0375, wR2 = 0.0950                   |                                |
| R indices (all data)              | R1 = 0.0619, wR2 = 0.1007                   |                                |
| Largest diff. peak and hole       | 0.626 and -0.607 e.Å <sup>-3</sup>          |                                |

Table S2. Atomic coordinates ( $\times 10^4$ ) and equivalent isotropic displacement parameters ( $\text{\AA}^2 \times 10^3$ ) for  $[\text{Mn}_6(\text{Et-Sao})_6(\text{EtOH})_4(\text{H}_2\text{O})_2(\text{C}_{10}\text{H}_4\text{O}_4\text{S}_2) \cdot \text{EtOH}]_n$ .  $U(\text{eq})$  is defined as one third of the trace of the orthogonalized  $U^{ij}$  tensor.

|       | x        | y       | z       | U(eq) |
|-------|----------|---------|---------|-------|
| Mn(1) | 476(1)   | 5953(1) | 956(1)  | 14(1) |
| Mn(2) | 2777(1)  | 5531(1) | 1707(1) | 18(1) |
| Mn(3) | 236(1)   | 3558(1) | 1451(1) | 17(1) |
| S(1)  | 342(1)   | 8451(1) | 4641(1) | 38(1) |
| O(1)  | 1151(1)  | 5049(1) | 1427(1) | 16(1) |
| O(2)  | 1565(1)  | 3214(1) | 1768(1) | 23(1) |
| O(3)  | -743(1)  | 2087(1) | 1420(1) | 24(1) |
| O(4)  | -985(1)  | 4661(1) | 532(1)  | 16(1) |
| O(5)  | -48(1)   | 6835(1) | 295(1)  | 18(1) |
| O(6)  | 2989(1)  | 6892(1) | 1307(1) | 22(1) |
| O(7)  | 4399(1)  | 5962(1) | 1942(1) | 25(1) |
| O(8)  | -159(1)  | 6574(1) | 2155(1) | 25(1) |
| O(9)  | 583(1)   | 6423(1) | 3510(1) | 34(1) |
| O(10) | 2763(1)  | 4464(1) | 317(1)  | 28(1) |
| O(11) | 2711(1)  | 6368(1) | 3172(1) | 35(1) |
| O(12) | 38(1)    | 4174(1) | 2906(1) | 30(1) |
| N(1)  | 2583(1)  | 4109(1) | 2134(1) | 20(1) |
| N(2)  | -1164(1) | 3858(1) | 1070(1) | 16(1) |
| N(3)  | 2039(1)  | 7194(1) | 1252(1) | 18(1) |
| C(1)  | -1731(2) | 1855(2) | 1785(1) | 23(1) |
| C(2)  | -2076(2) | 940(2)  | 2214(2) | 35(1) |
| C(3)  | -3066(2) | 680(2)  | 2637(2) | 45(1) |
| C(4)  | -3758(2) | 1305(2) | 2639(2) | 42(1) |
| C(5)  | -3460(2) | 2185(2) | 2191(2) | 34(1) |
| C(6)  | -2458(2) | 2473(2) | 1752(1) | 24(1) |
| C(7)  | -2212(2) | 3380(2) | 1247(1) | 20(1) |
| C(8)  | -3168(2) | 3748(2) | 956(1)  | 27(1) |
| C(9)  | -3132(2) | 4791(2) | 1640(2) | 42(1) |
| C(10) | 205(2)   | 7930(1) | 678(1)  | 18(1) |
| C(11) | -632(2)  | 8371(2) | 495(1)  | 24(1) |

|        |          |          |         |        |
|--------|----------|----------|---------|--------|
| C(12)  | -443(2)  | 9485(2)  | 855(1)  | 29(1)  |
| C(13)  | 590(2)   | 10180(2) | 1408(2) | 31(1)  |
| C(14)  | 1436(2)  | 9763(2)  | 1570(1) | 28(1)  |
| C(15)  | 1284(2)  | 8634(1)  | 1208(1) | 21(1)  |
| C(16)  | 2249(2)  | 8258(1)  | 1362(1) | 21(1)  |
| C(17)  | 3493(2)  | 9081(2)  | 1566(2) | 29(1)  |
| C(18)  | 3993(2)  | 9266(2)  | 685(2)  | 54(1)  |
| C(19)  | 4940(2)  | 5789(2)  | 2669(1) | 23(1)  |
| C(20)  | 6026(2)  | 6596(2)  | 3083(2) | 33(1)  |
| C(21)  | 6656(2)  | 6444(2)  | 3797(2) | 41(1)  |
| C(22)  | 6219(2)  | 5476(2)  | 4137(2) | 43(1)  |
| C(23)  | 5148(2)  | 4670(2)  | 3742(2) | 36(1)  |
| C(24)  | 4478(2)  | 4797(2)  | 3009(1) | 26(1)  |
| C(25)  | 3355(2)  | 3889(2)  | 2606(1) | 23(1)  |
| C(26)  | 3095(2)  | 2707(2)  | 2723(2) | 33(1)  |
| C(27)  | 2340(3)  | 2396(2)  | 3466(2) | 56(1)  |
| C(28)  | 134(2)   | 6885(2)  | 3013(1) | 23(1)  |
| C(29)  | -66(2)   | 7906(2)  | 3469(1) | 25(1)  |
| C(30)  | -502(2)  | 8546(2)  | 3076(1) | 35(1)  |
| C(31)  | -514(2)  | 9491(2)  | 3710(2) | 43(1)  |
| C(32)  | -69(2)   | 9569(2)  | 4588(1) | 31(1)  |
| C(33)  | -51(2)   | 3710(2)  | 3707(1) | 39(1)  |
| C(34A) | -1070(4) | 3814(4)  | 4163(3) | 58(1)  |
| C(34B) | 980(7)   | 4327(6)  | 4459(5) | 54(2)  |
| C(35A) | 3553(7)  | 7575(7)  | 3555(5) | 47(2)  |
| C(36A) | 3811(10) | 7671(9)  | 4615(8) | 97(3)  |
| C(35B) | 3488(5)  | 7320(5)  | 3757(4) | 51(1)  |
| C(36B) | 3893(7)  | 7092(6)  | 4675(5) | 100(2) |
| O(13)  | 4311(1)  | 3561(1)  | -427(1) | 48(1)  |
| C(37)  | 3863(2)  | 2367(2)  | -682(2) | 59(1)  |
| C(38)  | 3570(2)  | 1906(3)  | 154(3)  | 83(1)  |

---

Table S3. Bond lengths [Å] and angles [°] for  $[\text{Mn}_6(\text{Et-Sao})_6(\text{EtOH})_4(\text{H}_2\text{O})_2(\text{C}_{10}\text{H}_4\text{O}_4\text{S}_2) \cdot \text{EtOH}]_n$ .

---

|              |            |
|--------------|------------|
| Mn(1)–O(1)   | 1.8970(12) |
| Mn(1)–O(5)   | 1.9156(12) |
| Mn(1)–O(4)   | 1.9718(12) |
| Mn(1)–N(3)   | 2.0106(15) |
| Mn(1)–O(8)   | 2.1470(13) |
| Mn(1)–O(4)#1 | 2.4271(13) |
| Mn(2)–O(7)   | 1.8936(12) |
| Mn(2)–O(1)   | 1.8967(12) |
| Mn(2)–O(6)   | 1.9322(13) |
| Mn(2)–N(1)   | 2.0327(15) |
| Mn(2)–O(10)  | 2.2795(14) |
| Mn(2)–O(11)  | 2.2869(15) |
| Mn(3)–O(3)   | 1.8787(13) |
| Mn(3)–O(1)   | 1.8977(12) |
| Mn(3)–O(2)   | 1.9302(12) |
| Mn(3)–N(2)   | 2.0045(15) |
| Mn(3)–O(12)  | 2.2409(14) |
| S(1)–C(29)   | 1.7390(19) |
| S(1)–C(32)   | 1.740(2)   |
| O(2)–N(1)    | 1.3854(19) |
| O(3)–C(1)    | 1.339(2)   |
| O(4)–N(2)    | 1.4112(17) |
| O(4)–Mn(1)#1 | 2.4271(13) |
| O(5)–C(10)   | 1.363(2)   |
| O(6)–N(3)    | 1.3838(18) |
| O(7)–C(19)   | 1.347(2)   |
| O(8)–C(28)   | 1.264(2)   |
| O(9)–C(28)   | 1.267(2)   |
| O(10)–H(10A) | 0.8467     |
| O(10)–H(10B) | 0.8568     |
| O(11)–C(35B) | 1.381(6)   |
| O(11)–C(35A) | 1.538(8)   |
| O(11)–H(110) | 0.9144     |
| O(12)–C(33)  | 1.439(2)   |

|              |          |
|--------------|----------|
| O(12)-H(120) | 0.8337   |
| N(1)-C(25)   | 1.310(2) |
| N(2)-C(7)    | 1.304(2) |
| N(3)-C(16)   | 1.307(2) |
| C(1)-C(2)    | 1.416(3) |
| C(1)-C(6)    | 1.427(3) |
| C(2)-C(3)    | 1.386(3) |
| C(2)-H(2)    | 0.9300   |
| C(3)-C(4)    | 1.392(3) |
| C(3)-H(3)    | 0.9300   |
| C(4)-C(5)    | 1.396(3) |
| C(4)-H(4)    | 0.9300   |
| C(5)-C(6)    | 1.413(3) |
| C(5)-H(5)    | 0.9300   |
| C(6)-C(7)    | 1.484(3) |
| C(7)-C(8)    | 1.512(2) |
| C(8)-C(9)    | 1.539(3) |
| C(8)-H(8A)   | 0.9700   |
| C(8)-H(8B)   | 0.9700   |
| C(9)-H(9A)   | 0.9600   |
| C(9)-H(9B)   | 0.9600   |
| C(9)-H(9C)   | 0.9600   |
| C(10)-C(11)  | 1.404(2) |
| C(10)-C(15)  | 1.422(2) |
| C(11)-C(12)  | 1.395(3) |
| C(11)-H(11)  | 0.9300   |
| C(12)-C(13)  | 1.394(3) |
| C(12)-H(12)  | 0.9300   |
| C(13)-C(14)  | 1.384(3) |
| C(13)-H(13)  | 0.9300   |
| C(14)-C(15)  | 1.425(2) |
| C(14)-H(14)  | 0.9300   |
| C(15)-C(16)  | 1.483(2) |
| C(16)-C(17)  | 1.519(2) |
| C(17)-C(18)  | 1.517(3) |
| C(17)-H(17A) | 0.9700   |

|               |          |
|---------------|----------|
| C(17)-H(17B)  | 0.9700   |
| C(18)-H(18A)  | 0.9600   |
| C(18)-H(18B)  | 0.9600   |
| C(18)-H(18C)  | 0.9600   |
| C(19)-C(20)   | 1.409(3) |
| C(19)-C(24)   | 1.432(3) |
| C(20)-C(21)   | 1.379(3) |
| C(20)-H(20)   | 0.9300   |
| C(21)-C(22)   | 1.402(3) |
| C(21)-H(21)   | 0.9300   |
| C(22)-C(23)   | 1.390(3) |
| C(22)-H(22)   | 0.9300   |
| C(23)-C(24)   | 1.414(3) |
| C(23)-H(23)   | 0.9300   |
| C(24)-C(25)   | 1.484(3) |
| C(25)-C(26)   | 1.521(3) |
| C(26)-C(27)   | 1.522(3) |
| C(26)-H(26A)  | 0.9700   |
| C(26)-H(26B)  | 0.9700   |
| C(27)-H(27A)  | 0.9600   |
| C(27)-H(27B)  | 0.9600   |
| C(27)-H(27C)  | 0.9600   |
| C(28)-C(29)   | 1.503(2) |
| C(29)-C(30)   | 1.355(3) |
| C(30)-C(31)   | 1.423(3) |
| C(30)-H(30)   | 0.9300   |
| C(31)-C(32)   | 1.370(3) |
| C(31)-H(31)   | 0.9300   |
| C(32)-C(32)#2 | 1.468(4) |
| C(33)-C(34A)  | 1.517(5) |
| C(33)-C(34B)  | 1.528(7) |
| C(33)-H(33A)  | 0.9700   |
| C(33)-H(33B)  | 0.9700   |
| C(33)-H(33C)  | 0.9700   |
| C(33)-H(33D)  | 0.9700   |
| C(34A)-H(33D) | 0.5609   |

|                 |           |
|-----------------|-----------|
| C(34A)-H(34A)   | 0.9600    |
| C(34A)-H(34B)   | 0.9600    |
| C(34A)-H(34C)   | 0.9600    |
| C(34B)-H(34D)   | 0.9600    |
| C(34B)-H(34E)   | 0.9600    |
| C(34B)-H(34F)   | 0.9600    |
| C(35A)-C(36A)   | 1.575(13) |
| C(35A)-H(35A)   | 0.9700    |
| C(35A)-H(35B)   | 0.9700    |
| C(36A)-H(36A)   | 0.9600    |
| C(36A)-H(36B)   | 0.9600    |
| C(36A)-H(36C)   | 0.9600    |
| C(35B)-C(36B)   | 1.556(9)  |
| C(35B)-H(35C)   | 0.9700    |
| C(35B)-H(35D)   | 0.9700    |
| C(36B)-H(36D)   | 0.9600    |
| C(36B)-H(36E)   | 0.9600    |
| C(36B)-H(36F)   | 0.9600    |
| O(13)-C(37)     | 1.434(3)  |
| O(13)-H(130)    | 0.8525    |
| C(37)-C(38)     | 1.501(4)  |
| C(37)-H(37A)    | 0.9700    |
| C(37)-H(37B)    | 0.9700    |
| C(38)-H(38A)    | 0.9600    |
| C(38)-H(38B)    | 0.9600    |
| C(38)-H(38C)    | 0.9600    |
| O(1)-Mn(1)-O(5) | 169.37(5) |
| O(1)-Mn(1)-O(4) | 90.59(5)  |
| O(5)-Mn(1)-O(4) | 91.45(5)  |
| O(1)-Mn(1)-N(3) | 87.98(5)  |
| O(5)-Mn(1)-N(3) | 88.71(6)  |
| O(4)-Mn(1)-N(3) | 172.92(6) |
| O(1)-Mn(1)-O(8) | 100.27(5) |
| O(5)-Mn(1)-O(8) | 90.04(5)  |
| O(4)-Mn(1)-O(8) | 92.74(5)  |



|                   |           |
|-------------------|-----------|
| N(3)-Mn(1)-O(8)   | 94.34(6)  |
| O(1)-Mn(1)-O(4)#1 | 88.32(5)  |
| O(5)-Mn(1)-O(4)#1 | 81.51(5)  |
| O(4)-Mn(1)-O(4)#1 | 84.32(5)  |
| N(3)-Mn(1)-O(4)#1 | 88.70(5)  |
| O(8)-Mn(1)-O(4)#1 | 170.96(5) |
| O(7)-Mn(2)-O(1)   | 177.48(5) |
| O(7)-Mn(2)-O(6)   | 90.02(5)  |
| O(1)-Mn(2)-O(6)   | 90.91(5)  |
| O(7)-Mn(2)-N(1)   | 89.06(6)  |
| O(1)-Mn(2)-N(1)   | 90.01(5)  |
| O(6)-Mn(2)-N(1)   | 179.07(6) |
| O(7)-Mn(2)-O(10)  | 89.86(6)  |
| O(1)-Mn(2)-O(10)  | 87.71(5)  |
| O(6)-Mn(2)-O(10)  | 97.38(5)  |
| N(1)-Mn(2)-O(10)  | 82.76(6)  |
| O(7)-Mn(2)-O(11)  | 91.46(6)  |
| O(1)-Mn(2)-O(11)  | 90.86(5)  |
| O(6)-Mn(2)-O(11)  | 90.76(6)  |
| N(1)-Mn(2)-O(11)  | 89.12(6)  |
| O(10)-Mn(2)-O(11) | 171.75(5) |
| O(3)-Mn(3)-O(1)   | 176.29(5) |
| O(3)-Mn(3)-O(2)   | 90.29(6)  |
| O(1)-Mn(3)-O(2)   | 93.01(5)  |
| O(3)-Mn(3)-N(2)   | 88.25(6)  |
| O(1)-Mn(3)-N(2)   | 88.38(5)  |
| O(2)-Mn(3)-N(2)   | 177.33(6) |
| O(3)-Mn(3)-O(12)  | 93.24(6)  |
| O(1)-Mn(3)-O(12)  | 88.16(5)  |
| O(2)-Mn(3)-O(12)  | 94.74(6)  |
| N(2)-Mn(3)-O(12)  | 87.57(6)  |
| C(29)-S(1)-C(32)  | 91.89(9)  |
| Mn(2)-O(1)-Mn(1)  | 120.70(6) |
| Mn(2)-O(1)-Mn(3)  | 118.24(6) |
| Mn(1)-O(1)-Mn(3)  | 120.37(6) |
| N(1)-O(2)-Mn(3)   | 116.75(9) |

|                     |            |
|---------------------|------------|
| C(1)–O(3)–Mn(3)     | 121.75(11) |
| N(2)–O(4)–Mn(1)     | 112.83(9)  |
| N(2)–O(4)–Mn(1)#1   | 112.07(8)  |
| Mn(1)–O(4)–Mn(1)#1  | 95.68(5)   |
| C(10)–O(5)–Mn(1)    | 119.65(10) |
| N(3)–O(6)–Mn(2)     | 116.81(10) |
| C(19)–O(7)–Mn(2)    | 123.69(12) |
| C(28)–O(8)–Mn(1)    | 139.04(12) |
| Mn(2)–O(10)–H(10A)  | 137.2      |
| Mn(2)–O(10)–H(10B)  | 116.8      |
| H(10A)–O(10)–H(10B) | 105.7      |
| C(35B)–O(11)–C(35A) | 18.0(4)    |
| C(35B)–O(11)–Mn(2)  | 130.9(3)   |
| C(35A)–O(11)–Mn(2)  | 118.1(3)   |
| C(35B)–O(11)–H(110) | 106.2      |
| C(35A)–O(11)–H(110) | 106.9      |
| Mn(2)–O(11)–H(110)  | 114.2      |
| C(33)–O(12)–Mn(3)   | 133.65(12) |
| C(33)–O(12)–H(120)  | 107.9      |
| Mn(3)–O(12)–H(120)  | 116.5      |
| C(25)–N(1)–O(2)     | 115.94(14) |
| C(25)–N(1)–Mn(2)    | 128.04(13) |
| O(2)–N(1)–Mn(2)     | 115.28(10) |
| C(7)–N(2)–O(4)      | 117.19(14) |
| C(7)–N(2)–Mn(3)     | 127.30(12) |
| O(4)–N(2)–Mn(3)     | 115.49(10) |
| C(16)–N(3)–O(6)     | 116.68(14) |
| C(16)–N(3)–Mn(1)    | 126.33(12) |
| O(6)–N(3)–Mn(1)     | 116.94(10) |
| O(3)–C(1)–C(2)      | 118.17(17) |
| O(3)–C(1)–C(6)      | 123.25(16) |
| C(2)–C(1)–C(6)      | 118.57(18) |
| C(3)–C(2)–C(1)      | 121.1(2)   |
| C(3)–C(2)–H(2)      | 119.4      |
| C(1)–C(2)–H(2)      | 119.4      |
| C(2)–C(3)–C(4)      | 120.7(2)   |

|                   |            |
|-------------------|------------|
| C(2)-C(3)-H(3)    | 119.7      |
| C(4)-C(3)-H(3)    | 119.7      |
| C(3)-C(4)-C(5)    | 119.3(2)   |
| C(3)-C(4)-H(4)    | 120.4      |
| C(5)-C(4)-H(4)    | 120.4      |
| C(4)-C(5)-C(6)    | 121.6(2)   |
| C(4)-C(5)-H(5)    | 119.2      |
| C(6)-C(5)-H(5)    | 119.2      |
| C(5)-C(6)-C(1)    | 118.60(18) |
| C(5)-C(6)-C(7)    | 119.45(17) |
| C(1)-C(6)-C(7)    | 121.93(16) |
| N(2)-C(7)-C(6)    | 119.08(16) |
| N(2)-C(7)-C(8)    | 120.96(16) |
| C(6)-C(7)-C(8)    | 119.95(16) |
| C(7)-C(8)-C(9)    | 111.08(16) |
| C(7)-C(8)-H(8A)   | 109.4      |
| C(9)-C(8)-H(8A)   | 109.4      |
| C(7)-C(8)-H(8B)   | 109.4      |
| C(9)-C(8)-H(8B)   | 109.4      |
| H(8A)-C(8)-H(8B)  | 108.0      |
| C(8)-C(9)-H(9A)   | 109.5      |
| C(8)-C(9)-H(9B)   | 109.5      |
| H(9A)-C(9)-H(9B)  | 109.5      |
| C(8)-C(9)-H(9C)   | 109.5      |
| H(9A)-C(9)-H(9C)  | 109.5      |
| H(9B)-C(9)-H(9C)  | 109.5      |
| O(5)-C(10)-C(11)  | 117.25(15) |
| O(5)-C(10)-C(15)  | 122.86(15) |
| C(11)-C(10)-C(15) | 119.83(15) |
| C(12)-C(11)-C(10) | 121.15(17) |
| C(12)-C(11)-H(11) | 119.4      |
| C(10)-C(11)-H(11) | 119.4      |
| C(13)-C(12)-C(11) | 119.93(17) |
| C(13)-C(12)-H(12) | 120.0      |
| C(11)-C(12)-H(12) | 120.0      |
| C(14)-C(13)-C(12) | 119.44(17) |

|                     |            |
|---------------------|------------|
| C(14)-C(13)-H(13)   | 120.3      |
| C(12)-C(13)-H(13)   | 120.3      |
| C(13)-C(14)-C(15)   | 122.44(17) |
| C(13)-C(14)-H(14)   | 118.8      |
| C(15)-C(14)-H(14)   | 118.8      |
| C(10)-C(15)-C(14)   | 117.13(16) |
| C(10)-C(15)-C(16)   | 123.09(15) |
| C(14)-C(15)-C(16)   | 119.73(16) |
| N(3)-C(16)-C(15)    | 119.70(15) |
| N(3)-C(16)-C(17)    | 119.17(16) |
| C(15)-C(16)-C(17)   | 120.93(15) |
| C(18)-C(17)-C(16)   | 110.78(18) |
| C(18)-C(17)-H(17A)  | 109.5      |
| C(16)-C(17)-H(17A)  | 109.5      |
| C(18)-C(17)-H(17B)  | 109.5      |
| C(16)-C(17)-H(17B)  | 109.5      |
| H(17A)-C(17)-H(17B) | 108.1      |
| C(17)-C(18)-H(18A)  | 109.5      |
| C(17)-C(18)-H(18B)  | 109.5      |
| H(18A)-C(18)-H(18B) | 109.5      |
| C(17)-C(18)-H(18C)  | 109.5      |
| H(18A)-C(18)-H(18C) | 109.5      |
| H(18B)-C(18)-H(18C) | 109.5      |
| O(7)-C(19)-C(20)    | 118.52(18) |
| O(7)-C(19)-C(24)    | 122.51(16) |
| C(20)-C(19)-C(24)   | 118.90(18) |
| C(21)-C(20)-C(19)   | 121.6(2)   |
| C(21)-C(20)-H(20)   | 119.2      |
| C(19)-C(20)-H(20)   | 119.2      |
| C(20)-C(21)-C(22)   | 120.3(2)   |
| C(20)-C(21)-H(21)   | 119.8      |
| C(22)-C(21)-H(21)   | 119.8      |
| C(23)-C(22)-C(21)   | 119.1(2)   |
| C(23)-C(22)-H(22)   | 120.4      |
| C(21)-C(22)-H(22)   | 120.4      |
| C(22)-C(23)-C(24)   | 122.1(2)   |

|                     |            |
|---------------------|------------|
| C(22)-C(23)-H(23)   | 118.9      |
| C(24)-C(23)-H(23)   | 118.9      |
| C(23)-C(24)-C(19)   | 117.95(18) |
| C(23)-C(24)-C(25)   | 119.13(18) |
| C(19)-C(24)-C(25)   | 122.88(17) |
| N(1)-C(25)-C(24)    | 119.41(17) |
| N(1)-C(25)-C(26)    | 119.59(17) |
| C(24)-C(25)-C(26)   | 121.00(16) |
| C(25)-C(26)-C(27)   | 113.89(19) |
| C(25)-C(26)-H(26A)  | 108.8      |
| C(27)-C(26)-H(26A)  | 108.8      |
| C(25)-C(26)-H(26B)  | 108.8      |
| C(27)-C(26)-H(26B)  | 108.8      |
| H(26A)-C(26)-H(26B) | 107.7      |
| C(26)-C(27)-H(27A)  | 109.5      |
| C(26)-C(27)-H(27B)  | 109.5      |
| H(27A)-C(27)-H(27B) | 109.5      |
| C(26)-C(27)-H(27C)  | 109.5      |
| H(27A)-C(27)-H(27C) | 109.5      |
| H(27B)-C(27)-H(27C) | 109.5      |
| O(8)-C(28)-O(9)     | 126.09(17) |
| O(8)-C(28)-C(29)    | 115.79(17) |
| O(9)-C(28)-C(29)    | 118.12(16) |
| C(30)-C(29)-C(28)   | 128.26(17) |
| C(30)-C(29)-S(1)    | 111.09(14) |
| C(28)-C(29)-S(1)    | 120.58(14) |
| C(29)-C(30)-C(31)   | 113.30(18) |
| C(29)-C(30)-H(30)   | 123.4      |
| C(31)-C(30)-H(30)   | 123.4      |
| C(32)-C(31)-C(30)   | 113.25(19) |
| C(32)-C(31)-H(31)   | 123.4      |
| C(30)-C(31)-H(31)   | 123.4      |
| C(31)-C(32)-C(32)#2 | 128.5(2)   |
| C(31)-C(32)-S(1)    | 110.46(14) |
| C(32)#2-C(32)-S(1)  | 121.0(2)   |
| O(12)-C(33)-C(34A)  | 109.9(2)   |

|                      |          |
|----------------------|----------|
| O(12)–C(33)–C(34B)   | 113.9(3) |
| C(34A)–C(33)–C(34B)  | 104.0(4) |
| O(12)–C(33)–H(33A)   | 109.7    |
| C(34A)–C(33)–H(33A)  | 109.7    |
| C(34B)–C(33)–H(33A)  | 5.9      |
| O(12)–C(33)–H(33B)   | 109.7    |
| C(34A)–C(33)–H(33B)  | 109.7    |
| C(34B)–C(33)–H(33B)  | 109.5    |
| H(33A)–C(33)–H(33B)  | 108.2    |
| O(12)–C(33)–H(33C)   | 108.3    |
| C(34A)–C(33)–H(33C)  | 112.2    |
| C(34B)–C(33)–H(33C)  | 108.6    |
| H(33A)–C(33)–H(33C)  | 107.0    |
| H(33B)–C(33)–H(33C)  | 2.5      |
| O(12)–C(33)–H(33D)   | 108.9    |
| C(34A)–C(33)–H(33D)  | 5.8      |
| C(34B)–C(33)–H(33D)  | 109.3    |
| H(33A)–C(33)–H(33D)  | 115.0    |
| H(33B)–C(33)–H(33D)  | 105.2    |
| H(33C)–C(33)–H(33D)  | 107.7    |
| C(33)–C(34A)–H(33D)  | 10.1     |
| C(33)–C(34A)–H(34A)  | 109.5    |
| H(33D)–C(34A)–H(34A) | 116.2    |
| C(33)–C(34A)–H(34B)  | 109.5    |
| H(33D)–C(34A)–H(34B) | 112.0    |
| C(33)–C(34A)–H(34C)  | 109.5    |
| H(33D)–C(34A)–H(34C) | 99.7     |
| C(33)–C(34B)–H(34D)  | 109.5    |
| C(33)–C(34B)–H(34E)  | 109.5    |
| H(34D)–C(34B)–H(34E) | 109.5    |
| C(33)–C(34B)–H(34F)  | 109.5    |
| H(34D)–C(34B)–H(34F) | 109.5    |
| H(34E)–C(34B)–H(34F) | 109.5    |
| O(11)–C(35A)–C(36A)  | 105.0(6) |
| O(11)–C(35A)–H(35A)  | 110.7    |
| C(36A)–C(35A)–H(35A) | 110.7    |

|                      |          |
|----------------------|----------|
| O(11)–C(35A)–H(35B)  | 110.7    |
| C(36A)–C(35A)–H(35B) | 110.7    |
| H(35A)–C(35A)–H(35B) | 108.8    |
| C(35A)–C(36A)–H(36A) | 109.5    |
| C(35A)–C(36A)–H(36B) | 109.5    |
| H(36A)–C(36A)–H(36B) | 109.5    |
| C(35A)–C(36A)–H(36C) | 109.5    |
| H(36A)–C(36A)–H(36C) | 109.5    |
| H(36B)–C(36A)–H(36C) | 109.5    |
| O(11)–C(35B)–C(36B)  | 112.5(5) |
| O(11)–C(35B)–H(35C)  | 109.1    |
| C(36B)–C(35B)–H(35C) | 109.1    |
| O(11)–C(35B)–H(35D)  | 109.1    |
| C(36B)–C(35B)–H(35D) | 109.1    |
| H(35C)–C(35B)–H(35D) | 107.8    |
| C(35B)–C(36B)–H(36D) | 109.5    |
| C(35B)–C(36B)–H(36E) | 109.5    |
| H(36D)–C(36B)–H(36E) | 109.5    |
| C(35B)–C(36B)–H(36F) | 109.5    |
| H(36D)–C(36B)–H(36F) | 109.5    |
| H(36E)–C(36B)–H(36F) | 109.5    |
| C(37)–O(13)–H(130)   | 106.2    |
| O(13)–C(37)–C(38)    | 109.4(3) |
| O(13)–C(37)–H(37A)   | 109.8    |
| C(38)–C(37)–H(37A)   | 109.8    |
| O(13)–C(37)–H(37B)   | 109.8    |
| C(38)–C(37)–H(37B)   | 109.8    |
| H(37A)–C(37)–H(37B)  | 108.2    |
| C(37)–C(38)–H(38A)   | 109.5    |
| C(37)–C(38)–H(38B)   | 109.5    |
| H(38A)–C(38)–H(38B)  | 109.5    |
| C(37)–C(38)–H(38C)   | 109.5    |
| H(38A)–C(38)–H(38C)  | 109.5    |
| H(38B)–C(38)–H(38C)  | 109.5    |

---

Symmetry transformations used to generate equivalent atoms:

#1  $-x, -y+1, -z$  #2  $-x, -y+2, -z+1$



Table 4. Anisotropic displacement parameters ( $\text{\AA}^2 \times 10^3$ ) for mhp042. The anisotropic displacement factor exponent takes the form:  $-2\pi^2 [h^2 a^{*2} U^{11} + \dots + 2 h k a^* b^* U^{12}]$

|       | $U^{11}$ | $U^{22}$ | $U^{33}$ | $U^{23}$ | $U^{13}$ | $U^{12}$ |
|-------|----------|----------|----------|----------|----------|----------|
| Mn(1) | 16(1)    | 11(1)    | 15(1)    | 0(1)     | 1(1)     | 6(1)     |
| Mn(2) | 16(1)    | 16(1)    | 21(1)    | 3(1)     | 1(1)     | 8(1)     |
| Mn(3) | 17(1)    | 13(1)    | 21(1)    | 3(1)     | 2(1)     | 7(1)     |
| S(1)  | 72(1)    | 33(1)    | 19(1)    | -4(1)    | -2(1)    | 37(1)    |
| O(1)  | 16(1)    | 12(1)    | 20(1)    | 1(1)     | 1(1)     | 6(1)     |
| O(2)  | 21(1)    | 16(1)    | 30(1)    | 2(1)     | -3(1)    | 8(1)     |
| O(3)  | 26(1)    | 14(1)    | 33(1)    | 6(1)     | 5(1)     | 7(1)     |
| O(4)  | 20(1)    | 14(1)    | 16(1)    | 3(1)     | 1(1)     | 7(1)     |
| O(5)  | 23(1)    | 12(1)    | 19(1)    | -1(1)    | -1(1)    | 8(1)     |
| O(6)  | 16(1)    | 20(1)    | 33(1)    | 6(1)     | 3(1)     | 10(1)    |
| O(7)  | 17(1)    | 27(1)    | 32(1)    | 9(1)     | 2(1)     | 9(1)     |
| O(8)  | 32(1)    | 24(1)    | 19(1)    | -4(1)    | 6(1)     | 14(1)    |
| O(9)  | 53(1)    | 29(1)    | 25(1)    | -1(1)    | 4(1)     | 26(1)    |
| O(10) | 31(1)    | 33(1)    | 23(1)    | 0(1)     | 2(1)     | 19(1)    |
| O(11) | 33(1)    | 38(1)    | 28(1)    | -7(1)    | 0(1)     | 15(1)    |
| O(12) | 48(1)    | 22(1)    | 20(1)    | 4(1)     | 7(1)     | 15(1)    |
| N(1)  | 19(1)    | 19(1)    | 22(1)    | 2(1)     | 2(1)     | 9(1)     |
| N(2)  | 21(1)    | 12(1)    | 13(1)    | 1(1)     | 2(1)     | 5(1)     |
| N(3)  | 17(1)    | 17(1)    | 21(1)    | 2(1)     | 0(1)     | 8(1)     |
| C(1)  | 24(1)    | 19(1)    | 23(1)    | 3(1)     | 0(1)     | 4(1)     |
| C(2)  | 40(1)    | 27(1)    | 39(1)    | 14(1)    | 7(1)     | 10(1)    |
| C(3)  | 49(1)    | 36(1)    | 50(2)    | 26(1)    | 14(1)    | 7(1)     |
| C(4)  | 33(1)    | 44(1)    | 46(1)    | 21(1)    | 14(1)    | 5(1)     |
| C(5)  | 26(1)    | 39(1)    | 40(1)    | 16(1)    | 12(1)    | 11(1)    |
| C(6)  | 23(1)    | 21(1)    | 23(1)    | 5(1)     | 3(1)     | 4(1)     |
| C(7)  | 19(1)    | 21(1)    | 18(1)    | 2(1)     | 3(1)     | 8(1)     |
| C(8)  | 19(1)    | 34(1)    | 31(1)    | 12(1)    | 7(1)     | 11(1)    |
| C(9)  | 50(1)    | 53(1)    | 39(1)    | 13(1)    | 19(1)    | 36(1)    |
| C(10) | 26(1)    | 13(1)    | 17(1)    | 1(1)     | 4(1)     | 10(1)    |
| C(11) | 27(1)    | 19(1)    | 25(1)    | -1(1)    | -2(1)    | 12(1)    |
| C(12) | 36(1)    | 24(1)    | 31(1)    | 3(1)     | 0(1)     | 21(1)    |

|        |       |       |        |       |       |       |
|--------|-------|-------|--------|-------|-------|-------|
| C(13)  | 41(1) | 15(1) | 38(1)  | 0(1)  | 0(1)  | 16(1) |
| C(14)  | 30(1) | 13(1) | 37(1)  | -2(1) | -2(1) | 6(1)  |
| C(15)  | 25(1) | 15(1) | 23(1)  | 3(1)  | 2(1)  | 9(1)  |
| C(16)  | 22(1) | 16(1) | 21(1)  | 0(1)  | 1(1)  | 6(1)  |
| C(17)  | 22(1) | 17(1) | 45(1)  | 2(1)  | -1(1) | 5(1)  |
| C(18)  | 38(1) | 53(2) | 65(2)  | 24(1) | 16(1) | 4(1)  |
| C(19)  | 20(1) | 28(1) | 22(1)  | 0(1)  | 1(1)  | 13(1) |
| C(20)  | 24(1) | 34(1) | 35(1)  | 1(1)  | 1(1)  | 9(1)  |
| C(21)  | 27(1) | 50(1) | 32(1)  | -5(1) | -6(1) | 7(1)  |
| C(22)  | 33(1) | 62(2) | 29(1)  | 8(1)  | -9(1) | 14(1) |
| C(23)  | 32(1) | 46(1) | 30(1)  | 12(1) | 0(1)  | 15(1) |
| C(24)  | 24(1) | 34(1) | 22(1)  | 3(1)  | 1(1)  | 13(1) |
| C(25)  | 25(1) | 25(1) | 21(1)  | 5(1)  | 0(1)  | 13(1) |
| C(26)  | 35(1) | 29(1) | 37(1)  | 11(1) | -6(1) | 14(1) |
| C(27)  | 75(2) | 40(1) | 43(2)  | 16(1) | 6(1)  | 8(1)  |
| C(28)  | 27(1) | 18(1) | 22(1)  | -2(1) | 7(1)  | 9(1)  |
| C(29)  | 36(1) | 23(1) | 16(1)  | -2(1) | 7(1)  | 15(1) |
| C(30)  | 62(1) | 36(1) | 15(1)  | -2(1) | 2(1)  | 31(1) |
| C(31)  | 84(2) | 40(1) | 23(1)  | 2(1)  | 4(1)  | 47(1) |
| C(32)  | 52(1) | 26(1) | 20(1)  | -2(1) | 4(1)  | 25(1) |
| C(33)  | 57(1) | 34(1) | 23(1)  | 6(1)  | 2(1)  | 14(1) |
| C(34A) | 58(3) | 69(3) | 26(2)  | 5(2)  | 17(2) | 2(2)  |
| C(34B) | 77(5) | 40(4) | 38(4)  | 8(3)  | -6(4) | 16(4) |
| O(13)  | 50(1) | 49(1) | 60(1)  | 23(1) | 27(1) | 29(1) |
| C(37)  | 51(2) | 53(2) | 82(2)  | 21(2) | 22(2) | 23(1) |
| C(38)  | 39(2) | 93(2) | 131(3) | 77(2) | 8(2)  | 18(2) |

---

Table 5. Hydrogen coordinates ( $\times 10^4$ ) and isotropic displacement parameters ( $\text{\AA}^2 \times 10^3$ ) for mhp042.

|        | x     | y     | z    | U(eq) |
|--------|-------|-------|------|-------|
| H(10A) | 3209  | 4184  | 59   | 42    |
| H(10B) | 2207  | 4342  | -101 | 42    |
| H(110) | 1992  | 6341  | 3286 | 53    |
| H(120) | 205   | 4858  | 3079 | 44    |
| H(2)   | -1631 | 505   | 2212 | 42    |
| H(3)   | -3270 | 82    | 2922 | 54    |
| H(4)   | -4411 | 1138  | 2936 | 50    |
| H(5)   | -3932 | 2591  | 2182 | 41    |
| H(8A)  | -3909 | 3149  | 918  | 32    |
| H(8B)  | -3086 | 3908  | 353  | 32    |
| H(9A)  | -3188 | 4640  | 2242 | 62    |
| H(9B)  | -3767 | 4986  | 1457 | 62    |
| H(9C)  | -2418 | 5397  | 1649 | 62    |
| H(11)  | -1324 | 7912  | 128  | 29    |
| H(12)  | -1006 | 9764  | 726  | 34    |
| H(13)  | 710   | 10917 | 1666 | 37    |
| H(14)  | 2129  | 10238 | 1927 | 34    |
| H(17A) | 3524  | 9785  | 1929 | 35    |
| H(17B) | 3951  | 8799  | 1920 | 35    |
| H(18A) | 4032  | 8586  | 354  | 81    |
| H(18B) | 4754  | 9835  | 828  | 81    |
| H(18C) | 3508  | 9495  | 315  | 81    |
| H(20)  | 6324  | 7246  | 2869 | 39    |
| H(21)  | 7373  | 6987  | 4053 | 49    |
| H(22)  | 6641  | 5375  | 4621 | 52    |
| H(23)  | 4863  | 4027  | 3966 | 43    |
| H(26A) | 3818  | 2621  | 2869 | 39    |
| H(26B) | 2713  | 2192  | 2145 | 39    |
| H(27A) | 2741  | 2857  | 4051 | 83    |
| H(27B) | 2169  | 1629  | 3475 | 83    |

|        |       |       |       |     |
|--------|-------|-------|-------|-----|
| H(27C) | 1633  | 2506  | 3340  | 83  |
| H(30)  | -767  | 8384  | 2453  | 42  |
| H(31)  | -795  | 10003 | 3544  | 52  |
| H(33A) | 654   | 4101  | 4135  | 47  |
| H(33B) | -151  | 2932  | 3534  | 47  |
| H(33C) | -119  | 2942  | 3522  | 47  |
| H(33D) | -751  | 3710  | 3953  | 47  |
| H(34A) | -1017 | 4572  | 4265  | 86  |
| H(34B) | -1063 | 3597  | 4739  | 86  |
| H(34C) | -1775 | 3339  | 3773  | 86  |
| H(34D) | 1684  | 4432  | 4197  | 81  |
| H(34E) | 939   | 3898  | 4916  | 81  |
| H(34F) | 966   | 5039  | 4736  | 81  |
| H(35A) | 3205  | 8097  | 3442  | 57  |
| H(35B) | 4257  | 7726  | 3275  | 57  |
| H(36A) | 3118  | 7259  | 4835  | 146 |
| H(36B) | 4083  | 8440  | 4930  | 146 |
| H(36C) | 4391  | 7374  | 4725  | 146 |
| H(35C) | 3132  | 7865  | 3888  | 61  |
| H(35D) | 4156  | 7633  | 3455  | 61  |
| H(36D) | 3233  | 6746  | 4961  | 150 |
| H(36E) | 4386  | 7783  | 5075  | 150 |
| H(36F) | 4311  | 6607  | 4554  | 150 |
| H(130) | 4708  | 3786  | -844  | 71  |
| H(37A) | 4434  | 2116  | -957  | 71  |
| H(37B) | 3177  | 2103  | -1130 | 71  |
| H(38A) | 4258  | 2144  | 584   | 124 |
| H(38B) | 3247  | 1107  | -19   | 124 |
| H(38C) | 3019  | 2171  | 431   | 124 |

---
